# Supplementary material
Source: HighWire-hosted journal article supplement (https://injuryprevention.bmj.com/highwire/filestream/160429/field_highwire_adjunct_files/0/ip-2023-044887supp001_data_supplement.pdf)
Supplement: ip-2023-044887supp001_data_supplement.pdf [file ip-2023-044887supp001_data_supplement.pdf]

Supplementary File 1: Key search terms and phrases associated with participation in sport and physical activity

Free-text search for specific popular participation sports in England and Wales: TARN

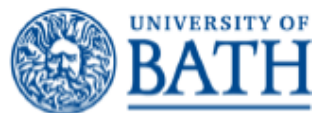

- Rugby
- Rugby union
- Rugby league
- Gymnastics
- Trampoline
- Trampolining
- Horse riding
- Horse racing
- Equestrian
- Jockey
- American football
- Wrestling
- Boxing
- Fencing
- Judo
- Taekwondo
- Martial arts
- Karate
- Gaelic
- Football
- Netball
- Tennis
- Squash
- Basketball
- Wheelchair basketball
- Wheelchair rugby
- Lacrosse
- Field hockey
- Ice hockey
- Roller derby
- Roller skating
- Skate boarding
- Skating
- Ice skating
- Rowing
- Sailing
- Canoe
- Kayak
- Swimming
- Athletics
- Running
- Triathlon
- Obstacle course
- Tough Mudder
- Spartan Run
- Rat Race
- Weight

Free-text search for specific popular participation sports in England and Wales: TARN

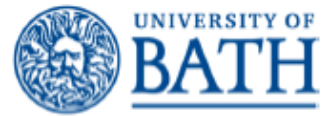

- Weight training
- Weight lifting
- Olympic lifting
- Tournament
- Competition
- Class
- Training
- Exercise
- Gym
- Badminton
- Cricket
- Cheerleading
- Golf
  
- Climbing
- Bouldering
- Skiing
- Snowsports
- Karting
- Gokarting
- Motocross
